# Supplementary material
Source: Springer Nature journal article supplement (https://www.springermedizin.de/resource/supplementary/12955_2009_650_MOESM4_ESM.pdf/9560998)

(a)  $p_R = 0, m+ - m- = 5$ 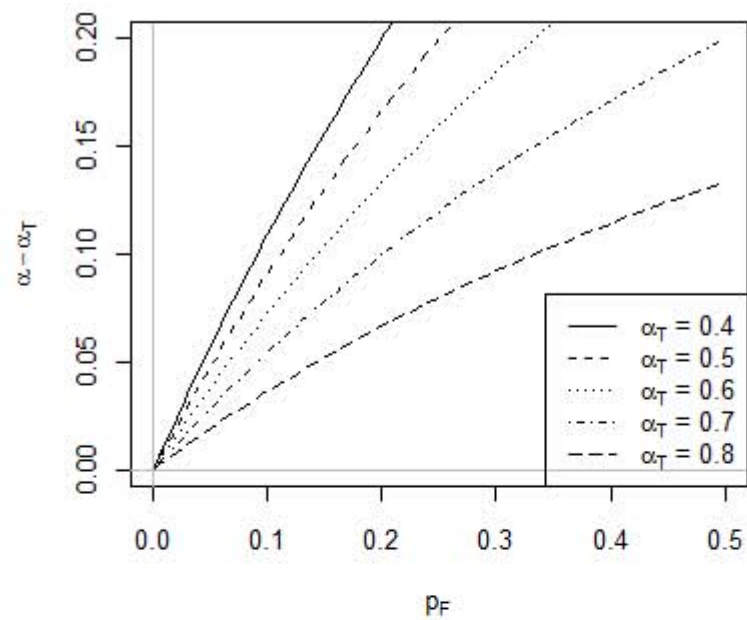(b)  $p_R = 0.1, m+ - m- = 5$ 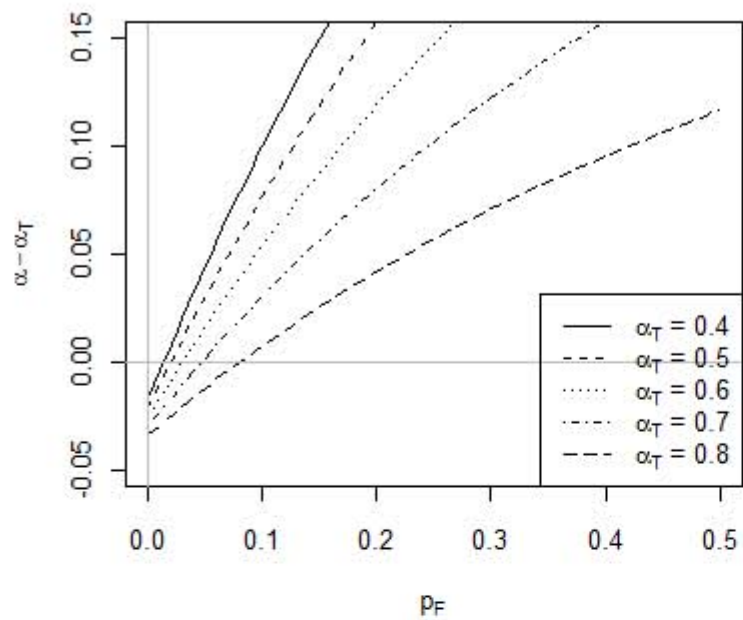(c)  $p_R = 0, m+ - m- = 1$ 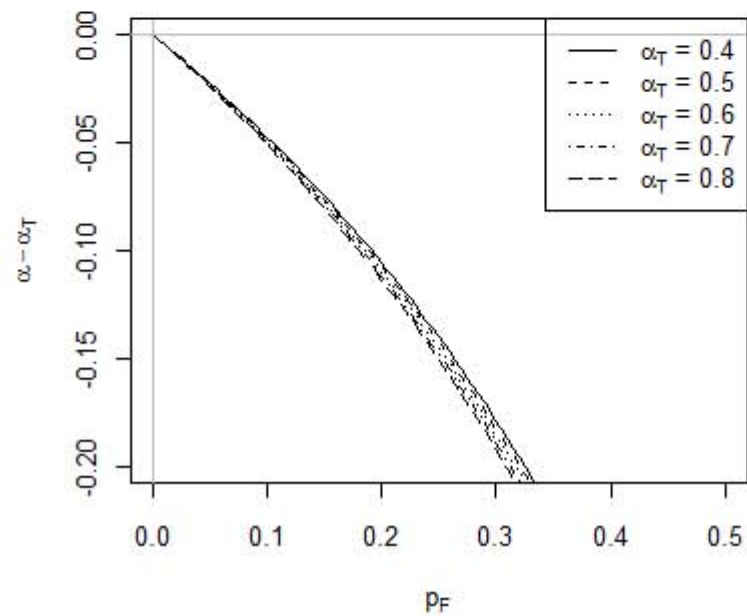(d)  $p_R = 0.1, m+ - m- = 1$ 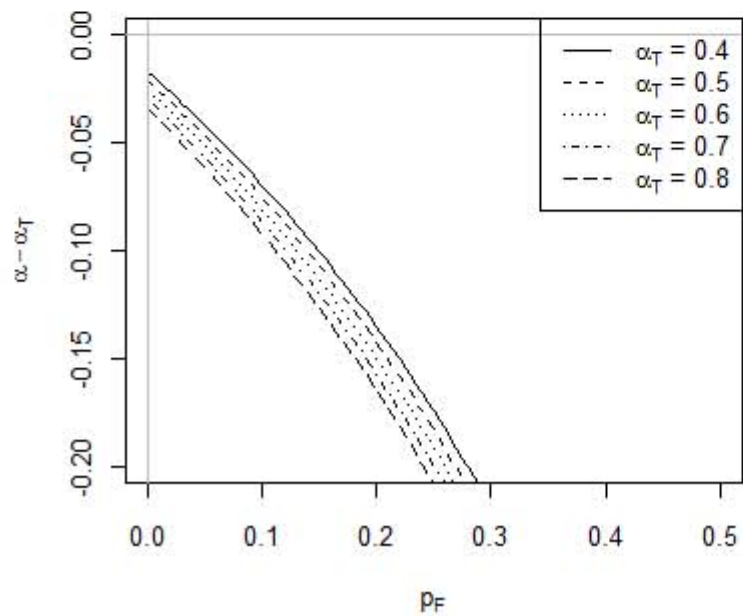

Supplement: MOESM4 [file 9560998]
